# Supplementary material for: Chronic Effects of Fusarium Mycotoxins in Rations with or without Increased Concentrate Proportion on the Insulin Sensitivity in Lactating Dairy Cows
Source: PubMed Central journal article supplement (PMC5983244; doi:10.3390/toxins10050188), 2018-05-08
Supplement: toxins-10-00188-s001.pdf [file toxins-10-00188-s001.pdf]

# Supplementary Materials: Chronic Effects of *Fusarium* Mycotoxins in Rations with or without Increased Concentrate Proportion on the Insulin Sensitivity in Lactating Dairy Cows

Asako Kinoshita, Christina Keese, Ulrich Meyer, Alexander Starke, Christine Wrenzycki, Sven Dänicke and Jürgen Rehage

**Table S1.** Sequence results of PCR products and their best hit gene in BLAST.

| Symb<br>ol | Sequence results of PCR products                                                                                                                                                                                                                                   | BLAST best hit<br>gene (NCBI)<br>description,<br>Sequence ID                               | Identit<br>ies |
|------------|--------------------------------------------------------------------------------------------------------------------------------------------------------------------------------------------------------------------------------------------------------------------|--------------------------------------------------------------------------------------------|----------------|
| SLC2<br>A1 | CGCTCAGCCGCCTACCGCCAGCCCATCCTCATTGCCG<br>TGGTGCTGCAG<br>CTGTCCCAGCAGCTGTCCGGCATCAACGCTGTTTTCT<br>ATTACTCCACAA<br>GCATCTTCGAGAAGGCGGGGGTGCAGCAGCCCGTGT<br>ATGCCACCATCG<br>GCTCTGGCATCGTCAACACAGCCTTCACTGTCGTGTC<br>TCTA                                             | Bos taurus<br>solute carrier<br>family 2<br>member 1<br>(SLC2A1),<br>mRNA<br>NM_174602.2   | 185/186        |
| SLC2<br>A4 | CTGCTGAGATCTGGTCAACGTCCTGCCACGGGTTTCA<br>GGCACTTTTAA<br>GAAGGTGAAGATGAAGAAGCCAAGCAGGAGGACCG<br>CGAATAGAAGA<br>AAGACGTAGGGACCCATAGCATCCGCCACATACTGG<br>AAACCCATGCC<br>GATGATGAAGTTGCATGTCCAGTTGGAG                                                                  | Bos taurus<br>solute carrier<br>family 2<br>member 4<br>(SLC2A4),<br>mRNA<br>NM_174604.1   | 166/168        |
| FBP1       | ACAGAAGATTTCGAAAGATGACCCTTCTGAGAAGGA<br>CGCTCTGCAGCC<br>AGGCCGGAACCTGGTGGCTGCTGGCTATGCGCTCTA<br>TGGCAGTGCCAC<br>TATGTTGGTCCTGGCCATGGCGAATGGAGTCAACTGC<br>TTCATGCTGGA<br>CCCGGCCATTGGAGAGTTCATTTTGGTGGACAGGGA<br>GCAGCCGGCTGGCCAGGAGGAGGGTGGCTGGCAG<br>AGCACATGCTGA | Bos taurus<br>fructose-<br>bisphosphatase<br>1 (FBP1), mRNA<br>NM_001034447.<br>2          | 176/176        |
| PCK1       | TTCTGGGCATCACCAACCCCAAGGGCCAGAAGAAGT<br>ACTTCGCGGCTG<br>CGTTTCCCAGCGCCTGTGGGAAGACCAACCTGGCCA<br>TGATGAACCCTA<br>CTCTCCCGGGATGGAAAGTAGAGTGTGTGGGTGATG<br>ATATCGCCTGGA<br>TGAAATTTGACCAACAAGGTAACCTTGCGG                                                             | Bos taurus<br>phosphoenolpyr<br>uvate<br>carboxykinase 1<br>(PCK1), mRNA<br>NM_174737.2    | 219/220        |
| PCK2       | CCTGGTATATGAGGCCTTCAACTGGCGCCACGGGGT<br>GTTTGTGGGCAG<br>TGCCATGCGCTCCGAGGCCACTGCAGCGGCTGAACA<br>CAAAGGGAAGG<br>TCATCATGCAAGTGGCTA                                                                                                                                  | Bos taurus<br>phosphoenolpyr<br>uvate<br>carboxykinase 2,<br>mitochondrial<br>(PCK2), mRNA | 105/105        |

|           |                                                                                                                                                                                                                                              |                                                                                                                 |         |
|-----------|----------------------------------------------------------------------------------------------------------------------------------------------------------------------------------------------------------------------------------------------|-----------------------------------------------------------------------------------------------------------------|---------|
|           |                                                                                                                                                                                                                                              | NM_001205594.<br>1                                                                                              |         |
| PC        | TACTGGGGAGGAGCCACCTTTGACGTCGCCATGCGC<br>TTCCTGTACGAG<br>TGCCCCTGGCGACGGCTGCAGGAGCTCCGGGAGCTC<br>GTCCCCAACATC<br>CCATTCCAGATGCTGCTGCGGGGGGCCAACGCCGTG<br>GGCTACACCAAC<br>TACCCCGACAATGTGGTCTTCAAGTTCTGCGAGGTGG<br>CCAAGGAGAAT<br>GGCATGGACATC | Bos taurus<br>pyruvate<br>carboxylase<br>(PC), mRNA<br>NM_177946.4                                              | 203/203 |
| CPT1<br>A | GAAGCAGCGTTCTTCGTGACGTTAGACGAAACCGAG<br>CAGGGATACAG<br>GGAGGAGGACCCGGAAACGTCGATGGACAGCTACG<br>CCAAGTCCCTGC<br>TGCATGGCAGGTGTTTCGACAGGTGGTTTGAATGGCT<br>GCCT                                                                                  | Bos taurus<br>carnitine<br>palmitoyltransfe<br>rase 1A<br>(CPT1A),<br>mRNA<br>NM_001304989.<br>1                | 124/124 |
| HMG<br>S2 | TTCACGCCTTTCTGCAGTTAGTCCAGAAATCCCTGGC<br>CCGCCTGATGTT<br>CAATGACTTCCTGTTGGCCAGTGGTGACACACAGAC<br>TGGCATCTACAA<br>GGGCTTGGAGGCCTTCAGGGGACTAAAGCTGGAAAA<br>GAACGCA                                                                             | Bos taurus 3-<br>hydroxy-3-<br>methylglutaryl-<br>CoA synthase 2<br>(HMGCS2),<br>mRNA<br>NM_001045883.<br>1     | 126     |
| HMG<br>L  | ATGCTGAGTCTTGAAGGCATCCAGAAATTCCTGGC<br>GTCAACTACCCA<br>GTCCTGACCCCAAACCTCAAAGGCTTCCAGGCAGCG<br>GTTGCTGCCGGA<br>GCCAAGGAAGTGGCCATCTTTGGAGCCGCCTCTGAA<br>CTCTTACCAAG<br>AAGAACATCAACTGCTCCATAGATGAGAGTTTGCAG<br>CGGTGAGAA                      | Bos taurus 3-<br>hydroxymethyl-<br>3-<br>methylglutaryl-<br>CoA lyase<br>(HMGCL),<br>mRNA<br>NM_001075132.<br>1 | 184/186 |
| BDH2      | TGTCCATCTCTGCAGAAGATAACAAGCCAGACCAAAT<br>CCTGAAGAGGC<br>ACTGAGCGATTTCTAAAGAGACAGAAAACAGGAA<br>GATTTGCAACTG<br>CAGAAGAAGTAGCCCTGCTCTGCGTGTACTTGGCCTC<br>TGATGAATCTG<br>CCTACATCACGGGGAATCCTGTT                                                | Bos taurus 3-<br>hydroxybutyrat<br>e<br>dehydrogenase<br>2 (BDH2),<br>mRNA<br>NM_001034488.<br>2                | 161/164 |
| ACC<br>A  | TACAGTCACTATGAAGTGGATCAGAGATTCATAGA<br>GAATTCCTAAA<br>TTTTTCACGTTCCGAGCAAGGGATAAGTTTGAGGAA<br>GATCGTATCTAT<br>CGTCACCTGGAGCCTGCCCTAGCTTTCCAGTTAGAGC<br>TGAACCGGATG<br>AGAAAAC TGAA                                                           | Bos taurus<br>acetyl-CoA<br>carboxylase<br>alpha (ACACA),<br>mRNA<br>NM_174224.2                                | 146/147 |

|           |                                                                                                                                                                                                                                                       |                                                                                                                                 |         |
|-----------|-------------------------------------------------------------------------------------------------------------------------------------------------------------------------------------------------------------------------------------------------------|---------------------------------------------------------------------------------------------------------------------------------|---------|
| FASN      | <p>AGGTCACTGCAGTCCTTCGATGCATCAGGGAATGGC<br/>TACTGCCGTGCA<br/>GAGGCTGTGATGGCCATCCTTCTGACCAAGAAGTCC<br/>CTGGCCCGACGG<br/>GTGTACGCCACCATCCTCAACGCTGGCACCAACACG<br/>GATGGCTGCAAA<br/>GAGAAAGA</p>                                                         | <p>PREDICTED:<br/>Bos taurus fatty<br/>acid synthase<br/>(FASN),<br/>transcript<br/>variant X1,<br/>mRNA<br/>XM_005220997.2</p> | 150/153 |
| GPA<br>M  | <p>CTATGGGCATATAGTTGACTACTGCGACAGCAGCAG<br/>TTCTTGGAGATT<br/>TTTCTGGAAGGCACACGCTCAAGAAGTGGA AAAATC<br/>CCTGTGCTCGGG<br/>CAGGACTTCTGT CAGTTGTGGTAGATACGCTGTCCAC<br/>CAATACGAACT<br/>G</p>                                                              | <p>Bos taurus<br/>glycerol-3-<br/>phosphate<br/>acyltransferase,<br/>mitochondrial<br/>(GPAM), mRNA<br/>NM_001012282.<br/>1</p> | 136/141 |
| DGA<br>T1 | <p>AGAGCGCCTGGCCGTGGGAGCTCTGACGGAGCAGG<br/>CGGGGCTGCTGC<br/>TGCACGGGGTCAACCTGGCCACCATTCTCTGCTTCCC<br/>AGCGGCCGTGG<br/>CCTTTCTCCTCGAGTCTATCACTCCAGTGGGCTCCGT<br/>GCTGGCCCTGAT<br/>GGTCTACACCATCCTCTTCCTCAAGCTGTTCTCCTAC<br/>CGGACCCTCCTG<br/>A</p>     | <p>Bos taurus<br/>diacylglycerol<br/>O-<br/>acyltransferase 1<br/>(DGAT1),<br/>mRNA<br/>NM_174693.2</p>                         | 182/182 |
| ACSL<br>1 | <p>TGTGTAGTGAGCGATTGTT CAGCATTGTGAAATGAC<br/>AGAGAACACGT<br/>TCATTCTACCTCAGATGACACTTTGATCTCTTTCTTG<br/>CCTCTGGCCCA<br/>TATGTTTGAGAGAGTTGTAGAGTGTGTGATGCTCTGT<br/>CATGGAGCTAA<br/>AATAGGATTTTTCCAAGGAGATATCAGGCTGCTTATG<br/>GATGATCTCAA<br/>GGCCAA</p> | <p>Bos taurus acyl-<br/>CoA synthetase<br/>long chain<br/>family member<br/>1 (ACSL1),<br/>mRNA<br/>NM_001076085.<br/>1</p>     | 195/196 |
| GUSB      | <p>ATTGAGGGTTTCACGAGGATCCACCACTGATGTTCA<br/>GTGAAGAGTACC<br/>AGAAAGGCCTGCTCCAGCAGTATCATGTGGTTCTGG<br/>ACCAAAAACGCA<br/>AAGAATATGTGGTTGGCGAGCTCAC</p>                                                                                                  | <p>Bos taurus<br/>glucuronidase<br/>beta (GUSB),<br/>mRNA<br/>NM_001083436.<br/>1</p>                                           | 118/119 |
